# Supplementary material for: G Protein Subunit Dissociation and Translocation Regulate Cellular Response to Receptor Stimulation
Source: PLoS One. 2009 Nov 11;4(11):e7797. doi: 10.1371/journal.pone.0007797 (PMC2777387; doi:10.1371/journal.pone.0007797)
Supplement: Figure S4 — Real time PCR analysis of the relative expression levels of the G protein gamma subunit family (0.11 MB PDF) [file pone.0007797.s004.pdf]

**Fig. S4**

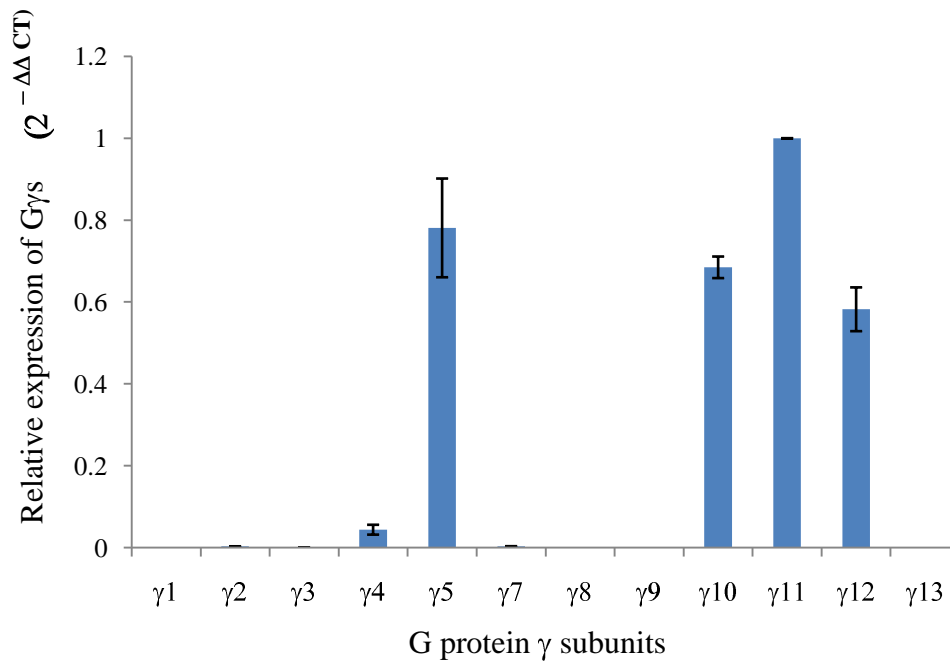

Real time PCR analysis of the relative expression levels of the G protein  $\gamma$  subunit family.  $\gamma 11$  is the preponderantly expressed  $\gamma$  subunit in A549. Relative expression levels of subunits ( $2^{-\Delta\Delta C_T}$ ) were determined with reference to that of  $\gamma 11$  after normalizing the expression of individual subunits to that of  $\beta$ -actin. Bars are  $\pm$  SEM (n=3). In a positive control using cDNAs for the  $\gamma$  subunit types, all primers amplified expected products.

Methods: Total RNA was extracted from A549 cells using RNeasy Plus Mini Kit (Qiagen). For cDNA synthesis, 1  $\mu$ g RNA was used in a 20  $\mu$ l Reverse Transcriptase reaction (ThermoScript RT-PCR system from Invitrogen). Real time PCR was performed in a 7500 Real Time PCR System (Applied Biosystems). For each reaction, 10 ng of the cDNA was used in a 20  $\mu$ l reaction containing 10  $\mu$ l of the Power SYBR Green PCR Master Mix (Applied Biosystems). Each reaction was performed in triplicate.

The following primers were used in the qRT-PCR analysis –

- $\gamma$ 1, GAAAGAAGTGACACTGGAAAG and CTCTGGGATGCCCTTTAC;  
 $\gamma$ 2, GCTGGTAGAGCAGCTTAAGATG and GGTCTTCCTTGGCATGTGC;  
 $\gamma$ 3, CAGCAGCAGACCTGATGAC and GAACTTCTTCTCCCGGAAGG;  
 $\gamma$ 4, CTGTGGAGCAGCTAAAGATG and GATGAGAGGATCTTCCCG;  
 $\gamma$ 5, GAAGAAAGTGGTTCAACAGC and GCAGACAGAACTGTTTCAAGTC;  
 $\gamma$ 7, GCATAGAA GCCGGGATTGAG and CAGGGACTCCGACCAGCAG;  
 $\gamma$ 8, GCAAGACGGTGGAAACAGC and CATCTTTGGCATGCGTCTC;  
 $\gamma$ 9 GTTGAAGATGGAGGTGGAGC and CTCCACGTAC TCCTTGATTTCC;  
 $\gamma$ 10, CAGCGCTTGGTAGAGCAG and CATCCTTGCAGGCATTCTG;  
 $\gamma$ 11, GAAGTGAAGTTGCAGAGACAAC and CTGGAATTCCCTTTACTAGAGG;  
 $\gamma$ 12, GTGCA GCAGTTAAGATTAGAAGCC and CTCCTGGCATGTTCTCAC;  
 $\gamma$ 13, CAAGTACCAGCT GGCCTTC and GTTCAGGAAGGGGTCCTTG.
