# Supplementary material for: G Protein Subunit Dissociation and Translocation Regulate Cellular Response to Receptor Stimulation
Source: PubMed Central journal article supplement (PMC2777387; doi:10.1371/journal.pone.0007797), 2009-11-11

**Fig. S2**

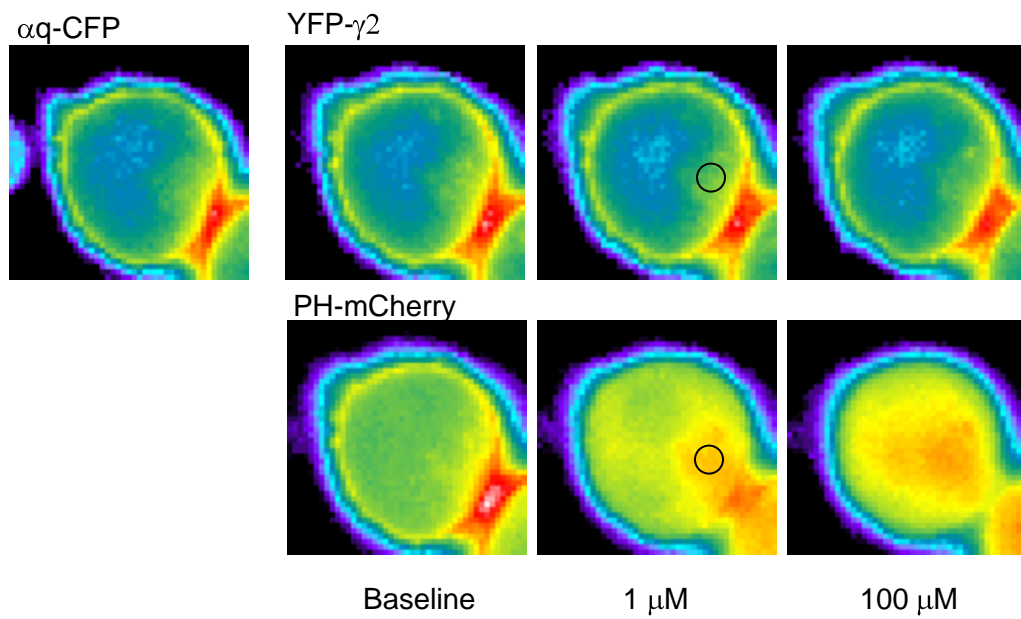

Supplement: pone.0007797.s002.pdf [file pone.0007797.s002.pdf]
