# Supplementary material for: G Protein Subunit Dissociation and Translocation Regulate Cellular Response to Receptor Stimulation
Source: PubMed Central journal article supplement (PMC2777387; doi:10.1371/journal.pone.0007797), 2009-11-11
Supplement: pone.0007797.s007.pdf [file pone.0007797.s007.pdf]

## Text S2

Effect of G protein  $\beta\gamma$  on PLC $\beta$  activation. CHO cells stably expressing M2 muscarinic receptor were transiently transfected with  $\alpha_o$ ,  $\beta_1$ , YFP- $\gamma_9$  subunits and PH-mCh sensor. The cells were imaged as described in the materials and methods section. Briefly, they are mounted on imaging chamber and sequentially exposed to 100  $\mu\text{M}$  of M2 receptor agonist (carbachol) followed by 100  $\mu\text{M}$  of antagonist (atropine). Images for YFP- $\gamma_{11}$  and PH-mCh were captured at every 10 sec interval. Translocation of YFP- $\gamma_{11}$  in response to M2 receptor activation was observed indicating that receptor activation status. The translocating  $\beta\gamma$  reverse translocated on plasma membrane on deactivation of the receptor. On the other hand no change in localization of PH-mCh was observed indicating towards failure of G $\beta\gamma$  to activate PLC $\beta$  which leads to PIP2 hydrolysis. Substitution of G $\gamma_{11}$  with other gamma subunits ( $\gamma_2$  or  $\gamma_3$ ) has no impact on the observations.

To ascertain that the cells are not mutated for PLC $\beta$  activity, transient introduction of a G $\alpha_q$  coupled receptor, M3 induced significant translocation of PH-mCh indicating that the cells used in the study were completely functionally proficient. These observations clearly indicated that no PLC $\beta$  activation through G $\beta\gamma$  in living cells is detected.
